# 1 **Illumina sequencing analysis of the ruminal microbiota in high-yield** 2 **and low-yield lactating dairy cows**

3 Jinjin Tong\*<sup>1</sup>, Hua Zhang\*<sup>1</sup>, Delian Yang\*, Benhai Xiong¶ and Linshu Jiang\*<sup>2</sup>

4 \*Beijing Key Laboratory for Dairy Cow Nutrition, Beijing University of Agriculture, Beijing,  
5 102206, P. R. China

6 ¶State Key Laboratory of Animal Nutrition, Institute of Animal Science, Chinese Academy of  
7 Agricultural Sciences, Beijing, 100193, P. R. China

## 8 **Abstract**

9 In this study, differences in the ruminal bacterial community between high-yield and  
10 low-yield lactating dairy cows fed the same diets were investigated. Sixteen lactating  
11 dairy cows with similar parity were divided into two groups based on their milk yield:  
12 high-yield (HY) and low-yield (LY) groups. On day 21, rumen content samples were  
13 collected, and the microbiota composition was determined using Illumina MiSeq  
14 sequencing of the 16S rRNA gene. During the study period, dry matter intake (DMI)  
15 and milk yield were measured daily, and milk composition was assessed 3 times per  
16 week. The results showed that the milk of the LY group tended to have higher fat  
17 ( $P=0.08$ ), protein ( $P=0.01$ ) and total solid ( $P=0.04$ ) contents than that of the HY  
18 group, though the HY group had higher ruminal acetate ( $P=0.05$ ), propionate  
19 ( $P=0.02$ ) and volatile fatty acid (VFA) ( $P=0.02$ ) concentrations. Principal coordinate  
20 analysis indicated significant differences in ruminal bacterial community composition  
21 and structure between the HY group and LY group. Overall, Bacteroidetes (HY  
22 group:  $52.91\pm 3.06\%$ ; LY group:  $61.88\pm 3.03\%$ ) was the predominant phylum,  
23 followed by Firmicutes (HY group:  $41.10\pm 2.74\%$ ; LY group:  $32.11\pm 2.97\%$ ). The  
24 abundances of *Ruminococcus 2*, Lachnospiraceae and *Eubacterium coprostanoligenes*  
25 were significantly higher in the HY group than in the LY group. In addition, 3  
26 genera—*Anaerostipes*, *Bacteroidales* and *Anaeroplasma*—were identified as  
27 biomarker species with the greatest impacts on the ruminal community structure in the

---

<sup>1</sup> These 2 authors contributed equally to this article.

<sup>2</sup> Corresponding author: [kjxnb@vip.sina.com](mailto:kjxnb@vip.sina.com)

28 LY group. These findings facilitate the understanding of bacterial synthesis within the  
29 rumen and reveal an important mechanism underlying differences in milk production  
30 in dairy cows.

31 **Key words: bacterial community, 16S rRNA, rumen, dairy cows**

## 32 **Introduction**

33 A symbiotic relationship exists with regard to the rumen microbiota of cattle. The  
34 rumen is a highly specialised organ of ruminant animals that promotes a community  
35 of mutualistic microbial species while simultaneously absorbing nutrients derived  
36 from digestion of plant fibre and cellular material [1]. In dairy cows, the rumen  
37 microbial community plays a critical role in the volatile fatty acid (VFA) production,  
38 B-vitamin synthesis, and microbial protein biosynthesis, which are critical for the  
39 animal's well-being and efficient milk production [2]. Moreover, the structure of the  
40 bacterial community has been correlated with the production traits [3], production  
41 variables [4-7], and milk production and composition [8] of dairy cows. It has been  
42 reported that rumen microbial dynamics involve both core and variable microbial  
43 components [9-11]. In addition, similar to the microbial community in the gut of non-  
44 ruminants, the structure and function of the microbial community in the cow rumen  
45 are shaped by dynamic physical, chemical, and predatory environments. In turn, the  
46 microbial community regulates nutrient cycling to the host [12]. However, a more in-  
47 depth comparison is warranted to improve our understanding of differences in rumen  
48 bacterial community composition between high-yield and low-yield dairy cows.

49 Recent efforts to study the rumen microbiome have focused on identifying and  
50 quantifying ruminal microbial communities [8, 13]. As a powerful molecular  
51 approach for taxonomic analyses, the application of 16S rRNA gene sequencing  
52 technology has provided novel insight into the microbiome ecology of gastrointestinal  
53 tracts [14, 15]. Indeed, this technique has been widely used to study microbial  
54 diversity and the metabolic capabilities of microbiomes in different ecological niches  
55 [16], fermented food [17, 18], waste-water treatment facilities [19], and human and  
56 animal gastrointestinal tracts [20-22]. The objective of the present study was to  
57 examine differences in ruminal bacterial community compositions between high-yield

58 and low-yield lactating cows.

## 59 **Materials and Methods**

### 60 **Animals and Experimental Design**

61 The experimental protocol was approved by the Institutional Animal Care and Use  
62 Committee at the Beijing University of Agriculture, in compliance with regulations  
63 for the administration of affairs concerning experimental animals (The State Science  
64 and Technology Commission of P. R. China, 1988). According to the principle of  
65 parity and lactation days, 16 Holstein lactating dairy cows of similar parity were used  
66 and assigned to a high-yield group (average production  $31.90 \pm 1.76$  kg/d, mean $\pm$ SD)  
67 or a low-yield group (average production  $19.30 \pm 1.76$  kg/d), with 8 each. The test  
68 period was 21 d, with a pre-feeding period of 14 d and a treatment period of 7 d.  
69 These lactating dairy cows were the fed same diet, the composition of which is shown  
70 in Table 1.

71 **Table 1 Ingredients and nutrient composition (% of DM) of the basal diet**

| Item                 | Content |
|----------------------|---------|
| Ingredient, % of DM  |         |
| Alfalfa hay          | 6.90    |
| Corn silage          | 46.32   |
| Oat grass            | 2.40    |
| Ground corn          | 9.88    |
| Soybean meal         | 5.10    |
| Steam-flaked corn    | 4.40    |
| DDGS <sup>1</sup>    | 4.40    |
| Corn bran            | 3.70    |
| Extruded soybean     | 3.00    |
| Barley               | 2.66    |
| Wheat barn           | 2.66    |
| Sodium cyclamate     | 2.40    |
| Oat                  | 1.50    |
| Canola meal          | 1.07    |
| Cottonseed meal      | 1.07    |
| Magalac <sup>2</sup> | 0.90    |
| NaHCO <sub>3</sub>   | 0.59    |
| Limestone            | 0.48    |
| NaCl                 | 0.27    |

---

|                                   |      |
|-----------------------------------|------|
| Premix <sup>3</sup>               | 0.30 |
| Nutrient composition <sup>4</sup> |      |
| CP                                | 17.4 |
| NDF                               | 31.1 |
| ADF                               | 16.6 |
| Ether extract                     | 5.00 |
| Ca                                | 0.78 |
| P                                 | 0.44 |
| NE <sub>L</sub> , Mcal/kg         | 1.76 |

---

72 <sup>1</sup>DDGS=dried distillers grain with solubles.

73 <sup>2</sup>Church and Dwight Co. Inc., Princeton, NJ.

74 <sup>3</sup>Formulated to provide (per kg of DM) 4,560 mg of Cu, 3,000 mg of Fe, 12,100 mg of Zn, 4,590  
75 mg of Mn, 60 mg of Co, 200 mg of Se, 270 mg of I, 10,000 IU of vitamin E, 450,000 IU of  
76 vitamin D, 2,000,000 IU of vitamin A, and 3,000 mg of nicotinic acid.

77 <sup>4</sup>Chemical composition is based on chemical analysis of the total mixed ration (TMR), as  
78 described.

### 79 **Rumen fluid sampling and parameter measurement**

80 Rumen fluid samples were collected from the oral cavity at 3-4 h after the  
81 morning feeding on day 7. The rumen contents were strained through 4 layers of  
82 cheesecloth with a mesh size of 250  $\mu$ m. Ruminal pH was immediately measured  
83 using a portable pH meter (Testo 205, Testo AG, Germany). The filtered rumen fluid  
84 samples were centrifuged at 10,000  $\times$  g for 15 min at 4°C, aliquoted into 5-mL  
85 cryopreservation tubes, frozen in liquid nitrogen tank and stored at -80°C for analysis  
86 of the ruminal bacterial community. Another 10 mL of clear supernatant samples was  
87 mixed with 2 mL of 250 g/L of metaphosphoric acid and stored at -20°C for VFA  
88 determination, as described by Pan et al. [23].

### 89 **DNA extraction and polymerase chain reaction (PCR) amplification**

90 Microbial DNA was extracted from rumen fluid samples using E.Z.N.A.®  
91 Bacterial DNA Kit (Omega Bio-Tek, Norcross, U.S.) according to the manufacturer's  
92 protocols. The yield and purity of the extracted DNA were assessed with a NanoDrop  
93 1000 instrument (NanoDrop, Wilmington, DE).

94 **16S rRNA analysis**

95 The V3-V4 regions of the 16S ribosomal RNA gene were amplified by PCR (95°C  
96 for 3 min, followed by 27 cycles at 95°C for 30 s, 55°C for 30 s, and 72°C for 45 s  
97 and a final extension at 72°C for 10 min) using the primers 338F 5'-barcode-  
98 ACTCCTACGGGAGGCAGCAG)-3' and 806R 5'-  
99 GGACTACHVGGGTWTCTAAT-3', where the barcode is an eight-base sequence  
100 unique to each sample. The PCR reactions were performed in triplicate in a 20-µL  
101 mixture containing 4 µL of 5 × FastPfu Buffer, 2 µL of 2.5 mM deoxyribonucleotide  
102 triphosphates (dNTPs), 0.8 µL of each primer (5 µM), 0.4 µL of FastPfu Polymerase,  
103 0.2 µL of bovine serum albumin (BSA) and 10 ng of the template DNA. Amplicons  
104 were excised from 2% agarose gels and purified using AxyPrep DNA Gel Extraction  
105 Kit (Axygen Biosciences, Union City, U.S.) according to the manufacturer's  
106 instructions and then quantified using QuantiFluor™ -ST (Promega, U.S.). Purified  
107 amplicons were pooled in equimolar ratios and pair-end sequenced (2 × 300) on the  
108 Illumina MiSeq platform according to standard protocols. The raw reads were  
109 deposited into the NCBI Sequence Read Archive (SRA) database (Accession  
110 Number: SRP136923).

111 The raw fastQ files were quality filtered by Trimmomatic and merged by  
112 FLASH under the following criteria. First, the reads were truncated at any site  
113 receiving an average quality score of <20 over a 50-bp sliding window. Second,  
114 sequences with overlapping segments longer than 10 bp were merged according to  
115 their overlapping region, with a mismatch of no more than 2 bp. Finally, sequences of  
116 each sample were separated according to barcodes (exactly matching) and  
117 primers (allowing 2 nucleotide mismatching), and reads containing ambiguous bases  
118 were removed.

119 Operational taxonomic units (OTUs) were clustered with a 97% similarity cut-  
120 off using UPARSE (version 7.1 <http://drive5.com/uparse/>) with a novel 'greedy'  
121 algorithm that simultaneously performs chimera filtering and OTU clustering. The  
122 taxonomy of each 16S rRNA gene sequence was analysed according to the RDP  
123 Classifier algorithm (<http://rdp.cme.msu.edu/>) against the Silva (SSU123) 16S rRNA  
124 database using a confidence threshold of 70%.

## 125 **Statistical analysis**

126 Data were analysed with a mixed-model procedure (SAS Institute, Inc., Cary,  
127 NC), and Duncan's multiple comparison tests were employed to assess differences  
128 between means. Differences were considered statistically significant when  $P<0.05$   
129 and considered a trend when  $P<0.10$ .

## 130 **Results**

### 131 **Dry matter intake, milk yield, and milk composition**

132 Dry matter intake (DMI) was significantly greater in the high-yield (HY) group  
133 than in the low-yield (LY) group ( $P=0.03$ ). Milk production ( $19.3\pm 1.76$  and  $31.9\pm 1.76$   
134 kg/d, respectively;  $P<0.01$ ), 4% fat-corrected milk (FCM) ( $18.95\pm 1.73$  and  
135  $29.20\pm 1.73$  kg/d, respectively.  $P<0.01$ ) and energy-corrected milk (ECM)  
136 ( $21.07\pm 1.93$  and  $32.09\pm 1.93$  kg/d, respectively;  $P<0.01$ ) were significantly lower in  
137 the LY group than in the HY group (Table 2). The milk fat content tended to be  
138 higher ( $P=0.08$ ) (Table 2), and the milk protein content was significantly higher in the  
139 LY group than in the HY group ( $P<0.01$ ). No difference was observed in milk lactose  
140 content between the LY and HY groups ( $P=0.21$ ; Table 2). Fat, protein and lactose  
141 yields were significantly greater in the HY group than in the LY group (Table 2).  
142 However, somatic cell count (SCC) was not different between the HY and LY groups  
143 ( $P=0.13$ ; Table 2).

144 **Table 2. Milk and ECM from high-yielding and low-yielding dairy cows during the entire**  
145 **sampling period <sup>1</sup>**

| Items                                | LY    | HY    | SEM  | <i>P</i> -value |
|--------------------------------------|-------|-------|------|-----------------|
| Milk production (kg/d)               | 19.3  | 31.9  | 1.76 | <0.0001         |
| 4%FCM production (kg/d) <sup>2</sup> | 18.95 | 29.20 | 1.73 | <0.0001         |
| ECM production (kg/d) <sup>3</sup>   | 21.07 | 32.09 | 1.93 | <0.0001         |
| Milk composition                     |       |       |      |                 |
| Fat %                                | 4.02  | 3.48  | 0.28 | 0.0788          |
| Fat yield (kg/d)                     | 0.75  | 1.10  | 0.07 | 0.0004          |
| Protein %                            | 3.50  | 3.07  | 0.11 | 0.0023          |

|                          |       |       |      |         |
|--------------------------|-------|-------|------|---------|
| Protein yield (kg/d)     | 0.66  | 0.98  | 0.06 | 0.0002  |
| Lactose %                | 4.87  | 5.05  | 0.14 | 0.2127  |
| Lactose yield (kg/d)     | 0.92  | 1.61  | 0.10 | <0.0001 |
| Total solid content %    | 13.15 | 12.30 | 0.38 | 0.0417  |
| SCC (log <sub>10</sub> ) | 2.46  | 3.10  | 2.78 | 0.1339  |

146 <sup>1</sup>Data are presented as least squares means.

147 SCC=somatic cell count.

### 148 **Ruminal pH and VFA concentrations**

149 Rumen pH was not different between the HY group and the LY group (Table 3).  
 150 NH<sub>3</sub>-N (mg/dL) was greater in the HY group than in the LY group ( $P<0.01$ ), and  
 151 there was a significant increase in acetate, propionate and butyrate levels in the HY  
 152 group relative to the LY group ( $P<0.05$ ).

153 In addition, total VFA levels were significantly greater in the HY group than in the  
 154 LY group ( $P=0.02$ ). A lower trend was observed for the acetate:propionate ratio in the  
 155 HY group compared to the LY group ( $P=0.06$ ).

156 **Table 3. Effects of differences between high-yielding and low-yielding dairy cows on**  
 157 **metabolites in the rumen**

| Items                     | LY    | HY      | SEM  | <i>P</i> -value |
|---------------------------|-------|---------|------|-----------------|
| pH                        | 6.73  | 6.71    | 0.02 | 0.69            |
| NH <sub>3</sub> -N, mg/dL | 7.99  | 13.28** | 1.03 | 0.01            |
| <b>Molar proportion</b>   |       |         |      |                 |
| Acetate                   | 62.19 | 68.97*  | 1.78 | 0.05            |
| Propionate                | 21.94 | 26.35** | 0.97 | 0.02            |
| Isobutyrate               | 0.83  | 0.84    | 0.03 | 0.93            |
| Butyrate                  | 12.01 | 14.23** | 0.45 | 0.01            |
| Isovalerate               | 1.22  | 1.48    | 0.07 | 0.08            |
| Valerate                  | 1.57  | 1.76    | 0.06 | 0.14            |
| Acetate:propionate ratio  | 2.85  | 2.64    | 0.06 | 0.06            |
| Total VFA, mM             | 99.76 | 113.63  | 3.14 | 0.02            |

158 \* $P<0.05$ ; \*\* $P<0.01$ : Values within a sampling day followed by superscripted asterisks differ.

159 SEM=standard error of the mean.

### 160 **Diversity and richness of microbial communities**

161 In total, 2,382,338 merged sequences were acquired for the 16 samples from the dairy

162 cows, and 1,191,169 high-quality sequences, with an average read length of 440 bp,  
163 were classified as bacterial. On average, at least 54,144 sequences were obtained per  
164 sample, and greater than 99% depth coverage was achieved. The rarefaction curve  
165 generated tended to plateau, showing that the number of OTUs did not rise with an  
166 increasing volume of data. This finding showed that the data volume of sequencing  
167 was reasonable. The results of this study show that the sequencing data were  
168 reasonable and could reflect changes in most bacterial flora (Figure 1).

169 No significant differences were observed in alpha diversity index results between  
170 the HY and LY groups ( $P>0.05$ ) (Table 4). However, the coverage of the HY group  
171 was significantly higher than that of the LY group ( $P<0.01$ ), indicating greater  
172 community diversity for the HY group.

173

174

175 **Table 4. Alpha diversity index of rumen bacteria**

| Item     | LY      | HY       | SEM   | <i>P</i> -value |
|----------|---------|----------|-------|-----------------|
| Sobs     | 1196.13 | 1214.88  | 17.21 | 0.60            |
| Shannon  | 5.4104  | 5.4852   | 0.04  | 0.42            |
| Simpson  | 0.01    | 0.01     | 0.00  | 0.74            |
| ACE      | 1375.65 | 1360.65  | 18.75 | 0.70            |
| Chao     | 1378.64 | 1376.82  | 20.10 | 0.97            |
| Coverage | 0.9921  | 0.9938** | 0.00  | 0.001           |

176 \* $P<0.05$ ; \*\* $P<0.01$ : Values within a sampling day followed by superscript asterisks differ.

177 SEM=standard error of the mean;

178 Principal coordinate analysis (PCoA) results showed that the HY group was  
179 distinct from the LY group (Figure 2). Principal coordinates 1 and 2 accounted for  
180 24.94% and 12.25%, respectively, of the total variation.

181 Twenty-one bacterial phyla were identified across all samples. Bacteroidetes,  
182 Firmicutes and Proteobacteria were the three dominant phyla, representing 57.59%,  
183 35.86%, and 1.53%, respectively, of the total sequences (Figure 3). Thus, at the  
184 phylum level, Bacteroidetes and Firmicutes were particularly dominant. The HY  
185 group exhibited a greater abundance of Firmicutes and lower abundance of



186 Bacteroidetes than did the LY group ( $P<0.01$ ), whereas Proteobacteria was less  
187 abundant ( $P<0.05$ ).

188 At the genus level, taxa with a relative abundance of  $\geq 1\%$  in at least one sample were  
189 further analysed, and the relevant genera are presented in Figure 4 and Figure 5.  
190 Twenty-one genera were identified, 6 of which exhibited significantly different  
191 abundances between the groups. Specifically, 4 genera were more abundant in the HY  
192 group at  $P<0.01$ , including *Ruminococcaceae-NK4A214-group*, *Ruminococcus 2*,  
193 *Lachnospiraceae-BS11-gut-group*, and *[Eubacterium]-coprostanoligenes-group*, and  
194 2 were more abundant in the HY group at  $P<0.05$ : *Succiniclasticum* and  
195 *Christensenellaceae-R-7-group*.

#### 196 **Correlations between bacterial communities and ruminal variables**

197 As shown in Figure 6, the relative abundances of the genera *Bacteroides* and  
198 *Ruminococcus 2* were positively correlated with ruminal propionate and  $\text{NH}_3\text{-N}$   
199 concentrations ( $r>0.4$ ,  $P<0.05$ ) but negatively correlated with the ruminal ratio  
200 (acetate:propionate ratio) ( $r<-0.4$ ,  $P<0.05$ ). In addition, *norank\_o\_\_Mollicutes\_RF9*  
201 was positively correlated with ruminal acetate and VFA concentrations ( $r>0.4$ ,  
202  $P<0.05$ ). *Candidatus-Saccharimonas* was positively correlated with the ruminal  
203 propionate concentration ( $r>0.4$ ,  $P<0.05$ ) but negatively correlated with the ruminal  
204 ratio ( $r<-0.4$ ,  $P<0.05$ ). Moreover, the ratio was negatively correlated with *Schwartzia*  
205 ( $r<-0.6$ ,  $P<0.05$ ).

#### 206 **Discussion**

207 High-throughput sequencing has been widely used in studies of microbial flora in  
208 ruminants as a means of quickly and efficiently determining the microbial community  
209 structure of the rumen [24]. Differences in rumen microbiota between high- and low-  
210 yield dairy cows can therefore be characterised using high-throughput sequencing  
211 methods. The present study also linked rumen fluid VFAs with milk components and  
212 rumen microbes.

#### 213 **Changes in rumen fermentation parameters and milk composition**

214 Higher values for rumen fermentation parameters and milk composition were found in

215 the HY group compared to the LY group. This finding suggests that due to host–  
216 microbiota interactions, different cows may harbour different microbial species  
217 compositions, which are closely related to distinct differences in rumen fermentation  
218 parameters and milk composition. Furthermore, recent findings suggest an important  
219 relationship between VFAs and milk components [2, 25, 26]. Specifically, of the three  
220 principle VFAs, acetic and butyric acids are substrates for oxidation and are  
221 precursors of lipids [27, 28]. Propionic acid is the only glucogenic VFA, accounting  
222 for 65-80% of the net glucose supply in lactating dairy cows [29, 30]. In a previous  
223 study, milk yield was most highly related to rumen concentrations of butyrate and  
224 propionate [31]. In the present study, propionate and butyrate concentrations as well  
225 as fat, protein and lactose yields were significantly greater in the HY group than in the  
226 LY group, which is consistent with previous research [32]. The NH<sub>3</sub>-N concentration  
227 in rumen fluid can reflect the balance of protein degradation and synthesis under  
228 varying feed conditions. NH<sub>3</sub>-N is an intermediate product of feed protein, non-  
229 protein nitrogen degradation and microbial protein synthesis, and it is mainly affected  
230 by feed protein degradation, rumen wall absorption, microorganism utilisation and  
231 rumen chyme outflow rate [33-35]. Yang et al. [36] reported that the concentration of  
232 NH<sub>3</sub>-N should be higher than 5 mg/dL; otherwise, it will influence the "uncoupling"  
233 effect of ruminal fermentation and reduce the efficiency of microbial protein  
234 synthesis. According to our results, the NH<sub>3</sub>-N concentration was within the normal  
235 range, though that in the HY group was significantly higher than that in the LY group.  
236 These results indicate that rumen microbes promote protein degradation, providing a  
237 better understanding of difference in milk proteins between the two groups.

### 238 **Differences in rumen microbial composition between HY and LY groups**

239 No differences were observed in bacterial community richness and diversity between  
240 the groups. Three phyla predominated in both groups, which was consistent with  
241 previous studies reporting that the principal phyla of microbes in the rumen are  
242 Bacteroidetes, Firmicutes, and Proteobacteria. The proportions of these three phyla  
243 account for approximately 94% of the total [35, 37, 38]. Interestingly, our results  
244 showed that the abundance of Firmicutes in the HY group was higher than that in the

245 LY group, though the abundances of the two other dominant phyla were lower in the  
246 former than in the latter.

247 As previously described by Pan et al. [23], cows fed a high proportion of grain have a  
248 higher abundance of Firmicutes and a lower abundance of Proteobacteria than control  
249 cows, and other studies have shown that feeding a high amount of grain can promote  
250 milk production [39, 40]. Thus, the present study provides a better understanding of  
251 why cows fed the same diet can have different milk production. The present findings  
252 further demonstrate that Firmicutes plays an important role in milk production.

253

254 In agreement with other research results [11, 41], *Prevotella* was the most abundant  
255 genus in all samples. Although *Prevotella* was more abundant in the LY group than in  
256 the HY group, the difference was not significant. In contrast, *Ruminococcaceae*-  
257 *NK4A214*-group, *Ruminococcus* 2, *Lachnospiraceae*-*BS11*-gut-group and  
258 [*Eubacterium*]-*coprostanoligenes*-group were significantly different between the two  
259 groups, with higher abundances in the HY group than in the LY group. Jiang et al.  
260 [42] reported that the increase in the relative abundance of *Ruminococcus* partly  
261 explains why adding live yeast to the diet increases the in vivo digestibility of DM  
262 and NDF and the performance of cows. This result illustrates that high-performance  
263 cows have higher abundances of *Ruminococcus* in the rumen fluid, which is  
264 consistent with the present research results. Members of the family Lachnospiraceae  
265 are gram-positive obligate anaerobes that are mostly non-spore-forming bacteria [43,  
266 44]. Huws et al. [45] showed that Ruminococcaceae and Lachnospiraceae play  
267 predominant roles in biohydrogenation pathways within the rumen. As the primary  
268 succinate-utilising bacterial taxon, *Succiniclasticum* accounted for 7.45% of the total  
269 bacterial community in the HY group, with significantly greater abundance than in the  
270 LY group. A higher level of *Succiniclasticum* has been associated with greater  
271 production of succinate from starch degradation [46]. Moreover, the abundances of  
272 Christensenellaceae and Ruminococcaceae NK4A214 in the HY group were  
273 significantly higher than in the LY group, though little information about these two  
274 genera has been reported in the literature. The reasons for the altered status of genera

275 in cows with different milk production are unclear.

## 276 **Conclusion**

277 In summary, high-yield dairy cows have better ruminal fermentation patterns than do  
278 low-yield cows, which was partially attributed to the greater abundances of  
279 *Bacteroides*, *Ruminococcus* 2, *Ruminococcaceae* NK4A214, Lachnospiraceae,  
280 *Succinivlasticum*, *Eubacterium* and *Christensenella* in the former. Furthermore,  
281 rumen fermentation in high-yield cows exhibited higher VFA levels than that found in  
282 low-yield cows. Rumen microbial composition between high-yield and low-yield  
283 dairy cows differs, and microbial species diversity and distribution contribute to  
284 production-related phenotypes. Overall, our findings enhance our understanding of  
285 rumen bacteria in cows with different milk yields and provide new strategies for  
286 improving dairy cow production performance.

## 287 **Acknowledgements**

288 The study was supported by the National Nature Science Foundation of China (Grant  
289 No. 31772629 and No. 31702302), Beijing Municipal Education Commission Project  
290 (SQKM201710020011), Open Project Program of Beijing Key Laboratory of Dairy  
291 Cow Nutrition, Beijing University of Agriculture and the National Key Research and  
292 Development Plan (2016YFD0700205, 2016YFD0700201, 2017YFD0701604). The  
293 authors thank the members of the Beijing Key Laboratory for Dairy Cow Nutrition,  
294 Beijing University of Agriculture (Beijing, China) for their assistance in the sampling  
295 and analysis of the samples.

296

297 Figure 1. The rarefaction curve of sequencing based on OTUs<sup>1</sup>.

298 <sup>1</sup>OTUs, operational taxonomic units.

299 Figure 2. Principal coordinate analysis (PCoA) of bacterial community structures of the ruminal  
300 microbiota in the high-yielding group (green circles) and the low-yielding group (red triangles).

301 PCoA plots were constructed using the unweighted UniFrac method.

302 Figure 3. Percent composition of predominant phyla in the rumen.

303 Figure 4. Percent composition of genera in the rumen.

304 Figure 5. Percent composition and significance of genera in the rumen.  
305 Figure 6. Correlation analyses between the relative abundances of bacteria genera and ruminal  
306 fermentation parameters. Only genera with abundances significantly associated with ruminal  
307 VFA, propionate and acetate concentrations are presented. Green represents a negative correlation  
308 between the abundance of the species and the ratio ( $r < -0.4$ ), and red represents a positive  
309 correlation ( $r > 0.4$ ,  $0.01 < P \leq 0.05$  \*;  $0.001 < P \leq 0.01$  \*\*;  $P \leq 0.001$  \*\*\*; Values with a significant  
310 correlation followed by superscripted asterisks differ).

311

## 312 **References**

- 313 1. Delong EF, Stephen L, Stackebrandt E, Rosenberg E. Prokaryotic biology and symbiotic  
314 associations: Springer; 2013.
- 315 2. Krehbiel CR. INVITED REVIEW: Applied nutrition of ruminants: Fermentation and digestive  
316 physiology 1. Professional Animal Scientist. 2014;30(2):129-39.
- 317 3. Schären M, Frahm J, Kersten S, Meyer U, Hummel J, Breves G, et al. Interrelations between the  
318 rumen microbiota and production, behavioral, rumen-fermentation, metabolic, and immunological  
319 attributes of dairy cows. Journal of Dairy Science. 2018.
- 320 4. Guan LL, Nkrumah JD, Basarab JA, Moore SS. Linkage of microbial ecology to phenotype:  
321 correlation of rumen microbial ecology to cattle's feed efficiency. Fems Microbiology Letters.  
322 2008;288(1):85-91.
- 323 5. Li F, Guan LL. Metatranscriptomic Profiling Reveals Linkages between the Active Rumen  
324 Microbiome and Feed Efficiency in Beef Cattle. Applied & Environmental Microbiology.  
325 2017;83(9):AEM.00061-17.
- 326 6. Myer PR, Smith TPL, Wells JE, Kuehn LA, Freetly HC. Rumen Microbiome from Steers  
327 Differing in Feed Efficiency. Plos One. 2015;10(6):e0129174.
- 328 7. Shabat SK, Sasson G, Doronfaigenboim A, Durman T, Yaacoby S, Berg Miller ME, et al.  
329 Specific microbiome-dependent mechanisms underlie the energy harvest efficiency of ruminants. Isme  
330 Journal. 2016.
- 331 8. Jami E, White BA, Mizrahi I. Potential role of the bovine rumen microbiome in modulating milk  
332 composition and feed efficiency. Plos One. 2014;9(1):e85423.
- 333 9. Creevey CJ, Kelly WJ, Henderson G, Leahy SC. Determining the culturability of the rumen  
334 bacterial microbiome. Microbial Biotechnology. 2014;7(5):467-79.
- 335 10. Henderson G, Cox F, Ganesh S, Jonker A, Young W, Collaborators GRC, et al. Rumen microbial  
336 community composition varies with diet and host, but a core microbiome is found across a wide  
337 geographical range. Scientific Reports. 2016;6:14567.
- 338 11. Wu S, Baldwin RL, Li W, Li C, Connor EE, Li RW. The Bacterial Community Composition of  
339 the Bovine Rumen Detected Using Pyrosequencing of 16S rRNA Genes. Metagenomics. 2012;1(1):b1-  
340 11.
- 341 12. Church DC. The ruminant animal. Digestive physiology and nutrition. 1988.
- 342 13. Mcsweeney C, Mackie R. Commission on Genetic Resources for Food and Agriculture. Micro-  
343 organisms and ruminant digestion: State of knowledge, trends and future prospects. Background Study

- 344 Paper. 2012.
- 345 14. Dowd SE, Callaway TR, Wolcott RD, Sun Y, Mckeehan T, Hagevoort RG, et al. Evaluation of  
346 the bacterial diversity in the feces of cattle using 16S rDNA bacterial tag-encoded FLX amplicon  
347 pyrosequencing (bTEFAP). *Bmc Microbiology*. 2008;8(1):125.
- 348 15. Edwards JE, Mcewan NR, Travis AJ, Wallace RJ. 16S rDNA library-based analysis of ruminal  
349 bacterial diversity. *Antonie Van Leeuwenhoek*. 2004;86(3):263-81.
- 350 16. Bucbe M, Reich M, Murat C, Morin E, Nilsson RH, Uroz S, et al. 454 Pyrosequencing analyses  
351 of forest soils reveal an unexpectedly high fungal diversity. *New Phytologist*. 2009;184(2):449-56.
- 352 17. Hamberger A, Horn MA, Dumont MG, Murrell JC, Drake HL. Anaerobic consumers of  
353 monosaccharides in a moderately acidic fen. *Applied & Environmental Microbiology*.  
354 2008;74(10):3112.
- 355 18. Humblot C, Guyot JP. Pyrosequencing of Tagged 16S rRNA Gene Amplicons for Rapid  
356 Deciphering of the Microbiomes of Fermented Foods Such as Pearl Millet Slurries. *Applied &  
357 Environmental Microbiology*. 2009;75(13):4354-61.
- 358 19. Sanapareddy N, Hamp TJ, Gonzalez LC, Hilger HA, Fodor AA, Clinton SM. Molecular Diversity  
359 of a North Carolina Wastewater Treatment Plant as Revealed by Pyrosequencing. *Applied &  
360 Environmental Microbiology*. 2009;75(6):1688.
- 361 20. Mao SY, Huo WJ, Zhu WY. Microbiome-metabolome analysis reveals unhealthy alterations in  
362 the composition and metabolism of ruminal microbiota with increasing dietary grain in a goat model.  
363 *Environmental Microbiology*. 2016;18(2):525.
- 364 21. Gonzalo MF, Denman SE, Yang C, Jane C, Makoto M, Mcsweeney CS. Methane Inhibition  
365 Alters the Microbial Community, Hydrogen Flow, and Fermentation Response in the Rumen of Cattle.  
366 *Frontiers in Microbiology*. 2016;7(1087).
- 367 22. Danielsson R, Dicksved J, Sun L, Gonda H, Müller B, Schnürer A, et al. Methane Production in  
368 Dairy Cows Correlates with Rumen Methanogenic and Bacterial Community Structure. *Frontiers in  
369 Microbiology*. 2017;8:226.
- 370 23. Pan X, Xue F, Nan X, Tang Z, Wang K, Beckers Y, et al. Illumina Sequencing Approach to  
371 Characterize Thiamine Metabolism Related Bacteria and the Impacts of Thiamine Supplementation on  
372 Ruminal Microbiota in Dairy Cows Fed High-Grain Diets. *Frontiers in Microbiology*. 2017;8:1818.
- 373 24. Highlander SK. High throughput sequencing methods for microbiome profiling: application to  
374 food animal systems. *Animal Health Research Reviews*. 2012;13(1):40-53.
- 375 25. Armentano LE. Ruminant hepatic metabolism of volatile fatty acids, lactate and pyruvate. *Journal  
376 of Nutrition*. 1992;122(3 Suppl):838-42.
- 377 26. Tang C, Zhang K, Zhan T, Zhao Q, Zhang J. Metabolic Characterization of Dairy Cows Treated  
378 with Gossypol by Blood Biochemistry and Body Fluid Untargeted Metabolome Analyses. *Journal of  
379 Agricultural & Food Chemistry*. 2017.
- 380 27. Bauman DE, Griinari JM. NUTRITIONAL REGULATION OF MILK FAT SYNTHESIS.  
381 *Annual Review of Nutrition*. 2003;23(1):203-27.
- 382 28. Dijkstra J, Boer H, Van BJ, Bruining M, Tamminga S. Absorption of volatile fatty acids from the  
383 rumen of lactating dairy cows as influenced by volatile fatty acid concentration, pH and rumen liquid  
384 volume. *Br J Nutr*. 1993;69(2):385-96.
- 385 29. Reynolds CK, Aikman PC, Lupoli B, Humphries DJ, Beever DE. Splanchnic metabolism of dairy  
386 cows during the transition from late gestation through early lactation. *Journal of Dairy Science*.  
387 2003;86(4):1201-17.

- 388 30. Zarrin M, Grossen-Rösti L, Bruckmaier RM, Gross JJ. Elevation of blood  $\beta$ -hydroxybutyrate  
389 concentration affects glucose metabolism in dairy cows before and after parturition. *Journal of Dairy*  
390 *Science*. 2017;100(3):2323-33.
- 391 31. Seymour WM, Campbell DR, Johnson ZB. Relationships between rumen volatile fatty acid  
392 concentrations and milk production in dairy cows: a literature study. *Animal Feed Science &*  
393 *Technology*. 2005;119(1):155-69.
- 394 32. Sofyan A, Mitsumori M, Ohmori H, Uyeno Y, Hasunuma T, Akiyama K, et al. Differences in  
395 rumen fermentation characteristics between low - yield and high - yield dairy cows in early lactation.  
396 *Animal Science Journal*. 2017;88(7).
- 397 33. Colmenero JJO, Broderick GA. Effect of Dietary Crude Protein Concentration on Milk  
398 Production and Nitrogen Utilization in Lactating Dairy Cows 1. *Journal of Dairy Science*.  
399 2006;89(5):1704.
- 400 34. Mutsvangwa T, Davies KL, Mckinnon JJ, Christensen DA. Effects of dietary crude protein and  
401 rumen-degradable protein concentrations on urea recycling, nitrogen balance, omasal nutrient flow, and  
402 milk production in dairy cows. *Journal of Dairy Science*. 2016;99(8):6298-310.
- 403 35. Jin D, Zhao S, Wang P, Zheng N, Bu D, Yves B, et al. Insights into Abundant Rumen Ureolytic  
404 Bacterial Community Using Rumen Simulation System. *Frontiers in Microbiology*. 2016;7(887).
- 405 36. Yang WZ, Beauchemin KA, Rode LM. Effects of Grain Processing, Forage to Concentrate Ratio,  
406 and Forage Particle Size on Rumen pH and Digestion by Dairy Cows 1. *Journal of Dairy Science*.  
407 2001;84(10):2203-16.
- 408 37. Khafipour E, Krause DO, Plaizier JC. A grain-based subacute ruminal acidosis challenge causes  
409 translocation of lipopolysaccharide and triggers inflammation. *Journal of Dairy Science*.  
410 2009;92(3):1060-70.
- 411 38. Khafipour E, Li S, Plaizier JC, Krause DO. Rumen microbiome composition determined using  
412 two nutritional models of subacute ruminal acidosis. *Appl Environ Microbiol*. 2009;75(22):7115-24.
- 413 39. Rugoho I, Cheng L, Aizimu W, Bryant RH, Edwards GR. Effects of post - grazing herbage height  
414 and concentrate feeding on milk production and major milk fatty acids of dairy cows in mid - lactation.  
415 *Grass & Forage Science*. 2017;72(2):211-9.
- 416 40. Ueda K, Mitani T, Kondo S. Effect of timing and type of supplementary grain on herbage intake,  
417 nitrogen utilization and milk production in dairy cows grazed on perennial ryegrass pasture from  
418 evening to morning. *Animal Science Journal*. 2017;88(1):107-18.
- 419 41. Stevenson DM, Weimer PJ. Dominance of *Prevotella* and low abundance of classical ruminal  
420 bacterial species in the bovine rumen revealed by relative quantification real-time PCR. *Applied*  
421 *Microbiology & Biotechnology*. 2007;75(1):165.
- 422 42. Jiang Y, Ogunade IM, Qi S, Hackmann TJ, Staples C, Adesogan AT. Effects of the dose and  
423 viability of *Saccharomyces cerevisiae* . 2. Diversity of ruminal microbes as analyzed by Illumina  
424 MiSeq sequencing and quantitative PCR. *Journal of Dairy Science*. 2016;100(1):325.
- 425 43. Cotta M, Forster R. The Family Lachnospiraceae, Including the Genera *Butyrivibrio* ,  
426 *Lachnospira* and *Roseburia*: Springer US; 2006. : 727–35. p.
- 427 44. Hedberg ME, Moore ER, Svenssonstadler L, Hörstedt P, Baranov V, Hernell O, et al.  
428 *Lachnoanaerobaculum* gen. nov., a new genus in the Lachnospiraceae: characterization of  
429 *Lachnoanaerobaculum umeaense* gen. nov., sp. nov., isolated from the human small intestine, and  
430 *Lachnoanaerobaculum orale* sp. nov., isolated from saliva, and reclassifica. *International Journal of*  
431 *Systematic & Evolutionary Microbiology*. 2012;62(Pt 11):2685.

- 432 45. Huws SA, Kim EJ, Lee MRF, Scott MB, Tweed JKS, Pinloche E, et al. As yet uncultured bacteria  
433 phylogenetically classified as Prevotella, Lachnospiraceae incertae sedis and unclassified  
434 Bacteroidales, Clostridiales and Ruminococcaceae may play a predominant role in ruminal  
435 biohydrogenation. *Environmental Microbiology*. 2011;13(6):1500-12.
- 436 46. Hook SE, Steele MA, Northwood KS, Dijkstra J, France J, Wright AD, et al. Impact of subacute  
437 ruminal acidosis (SARA) adaptation and recovery on the density and diversity of bacteria in the rumen  
438 of dairy cows. *Fems Microbiology Ecology*. 2011;78(2):275–84.
- 439

440



# Chao curves

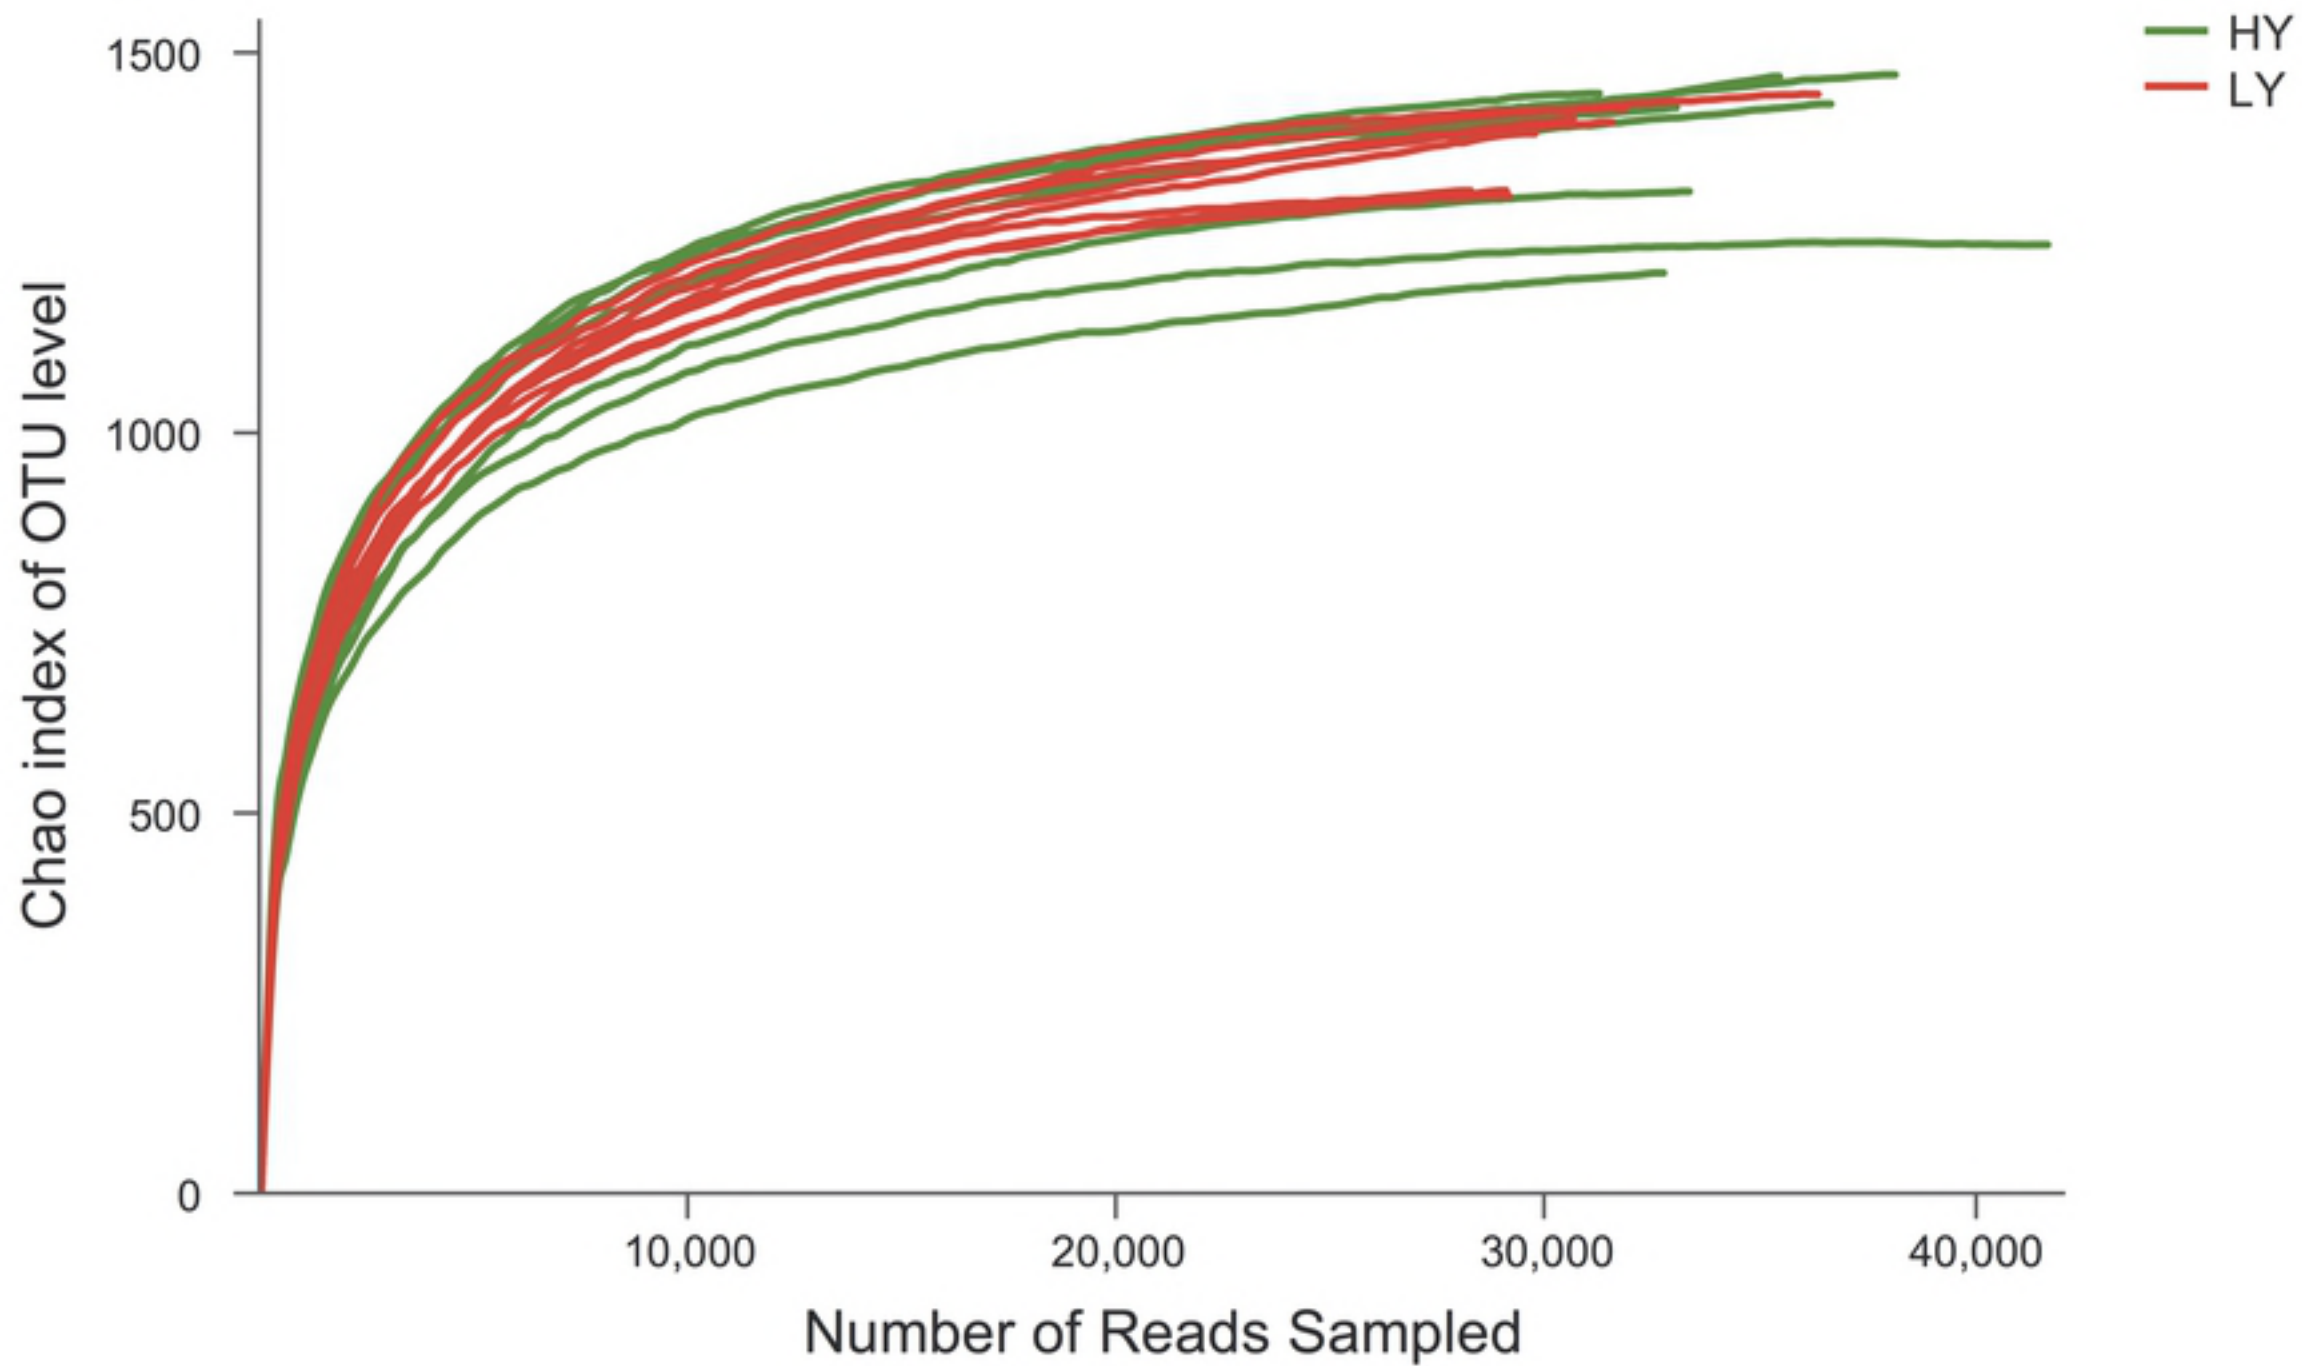

PCoA on OTU level

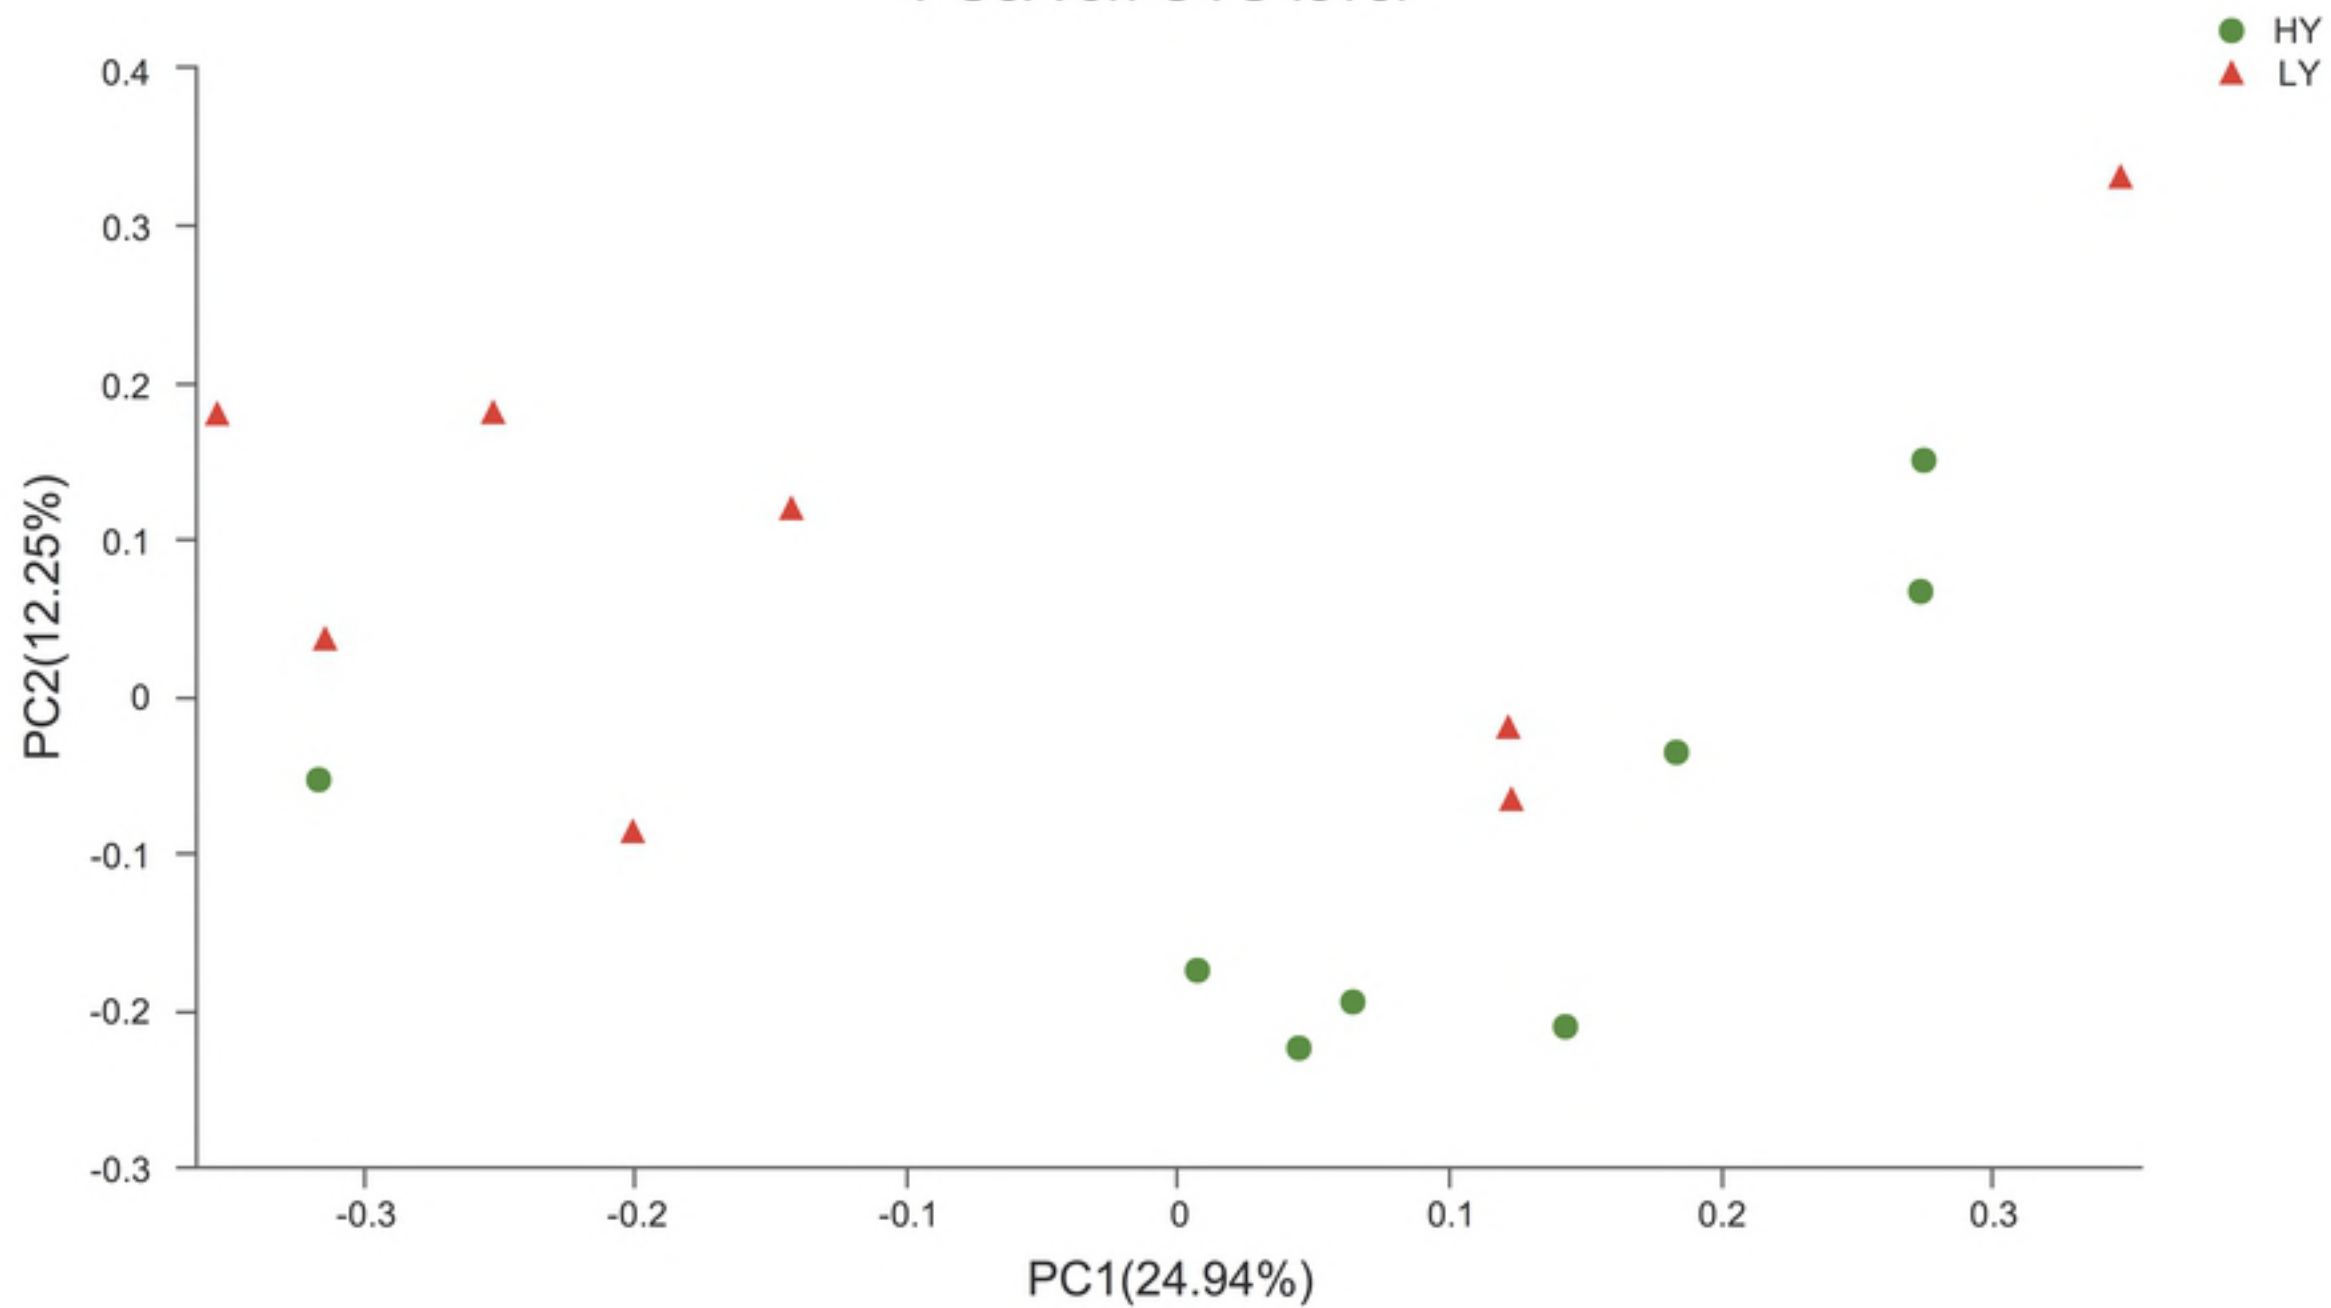

# Community barplot analysis

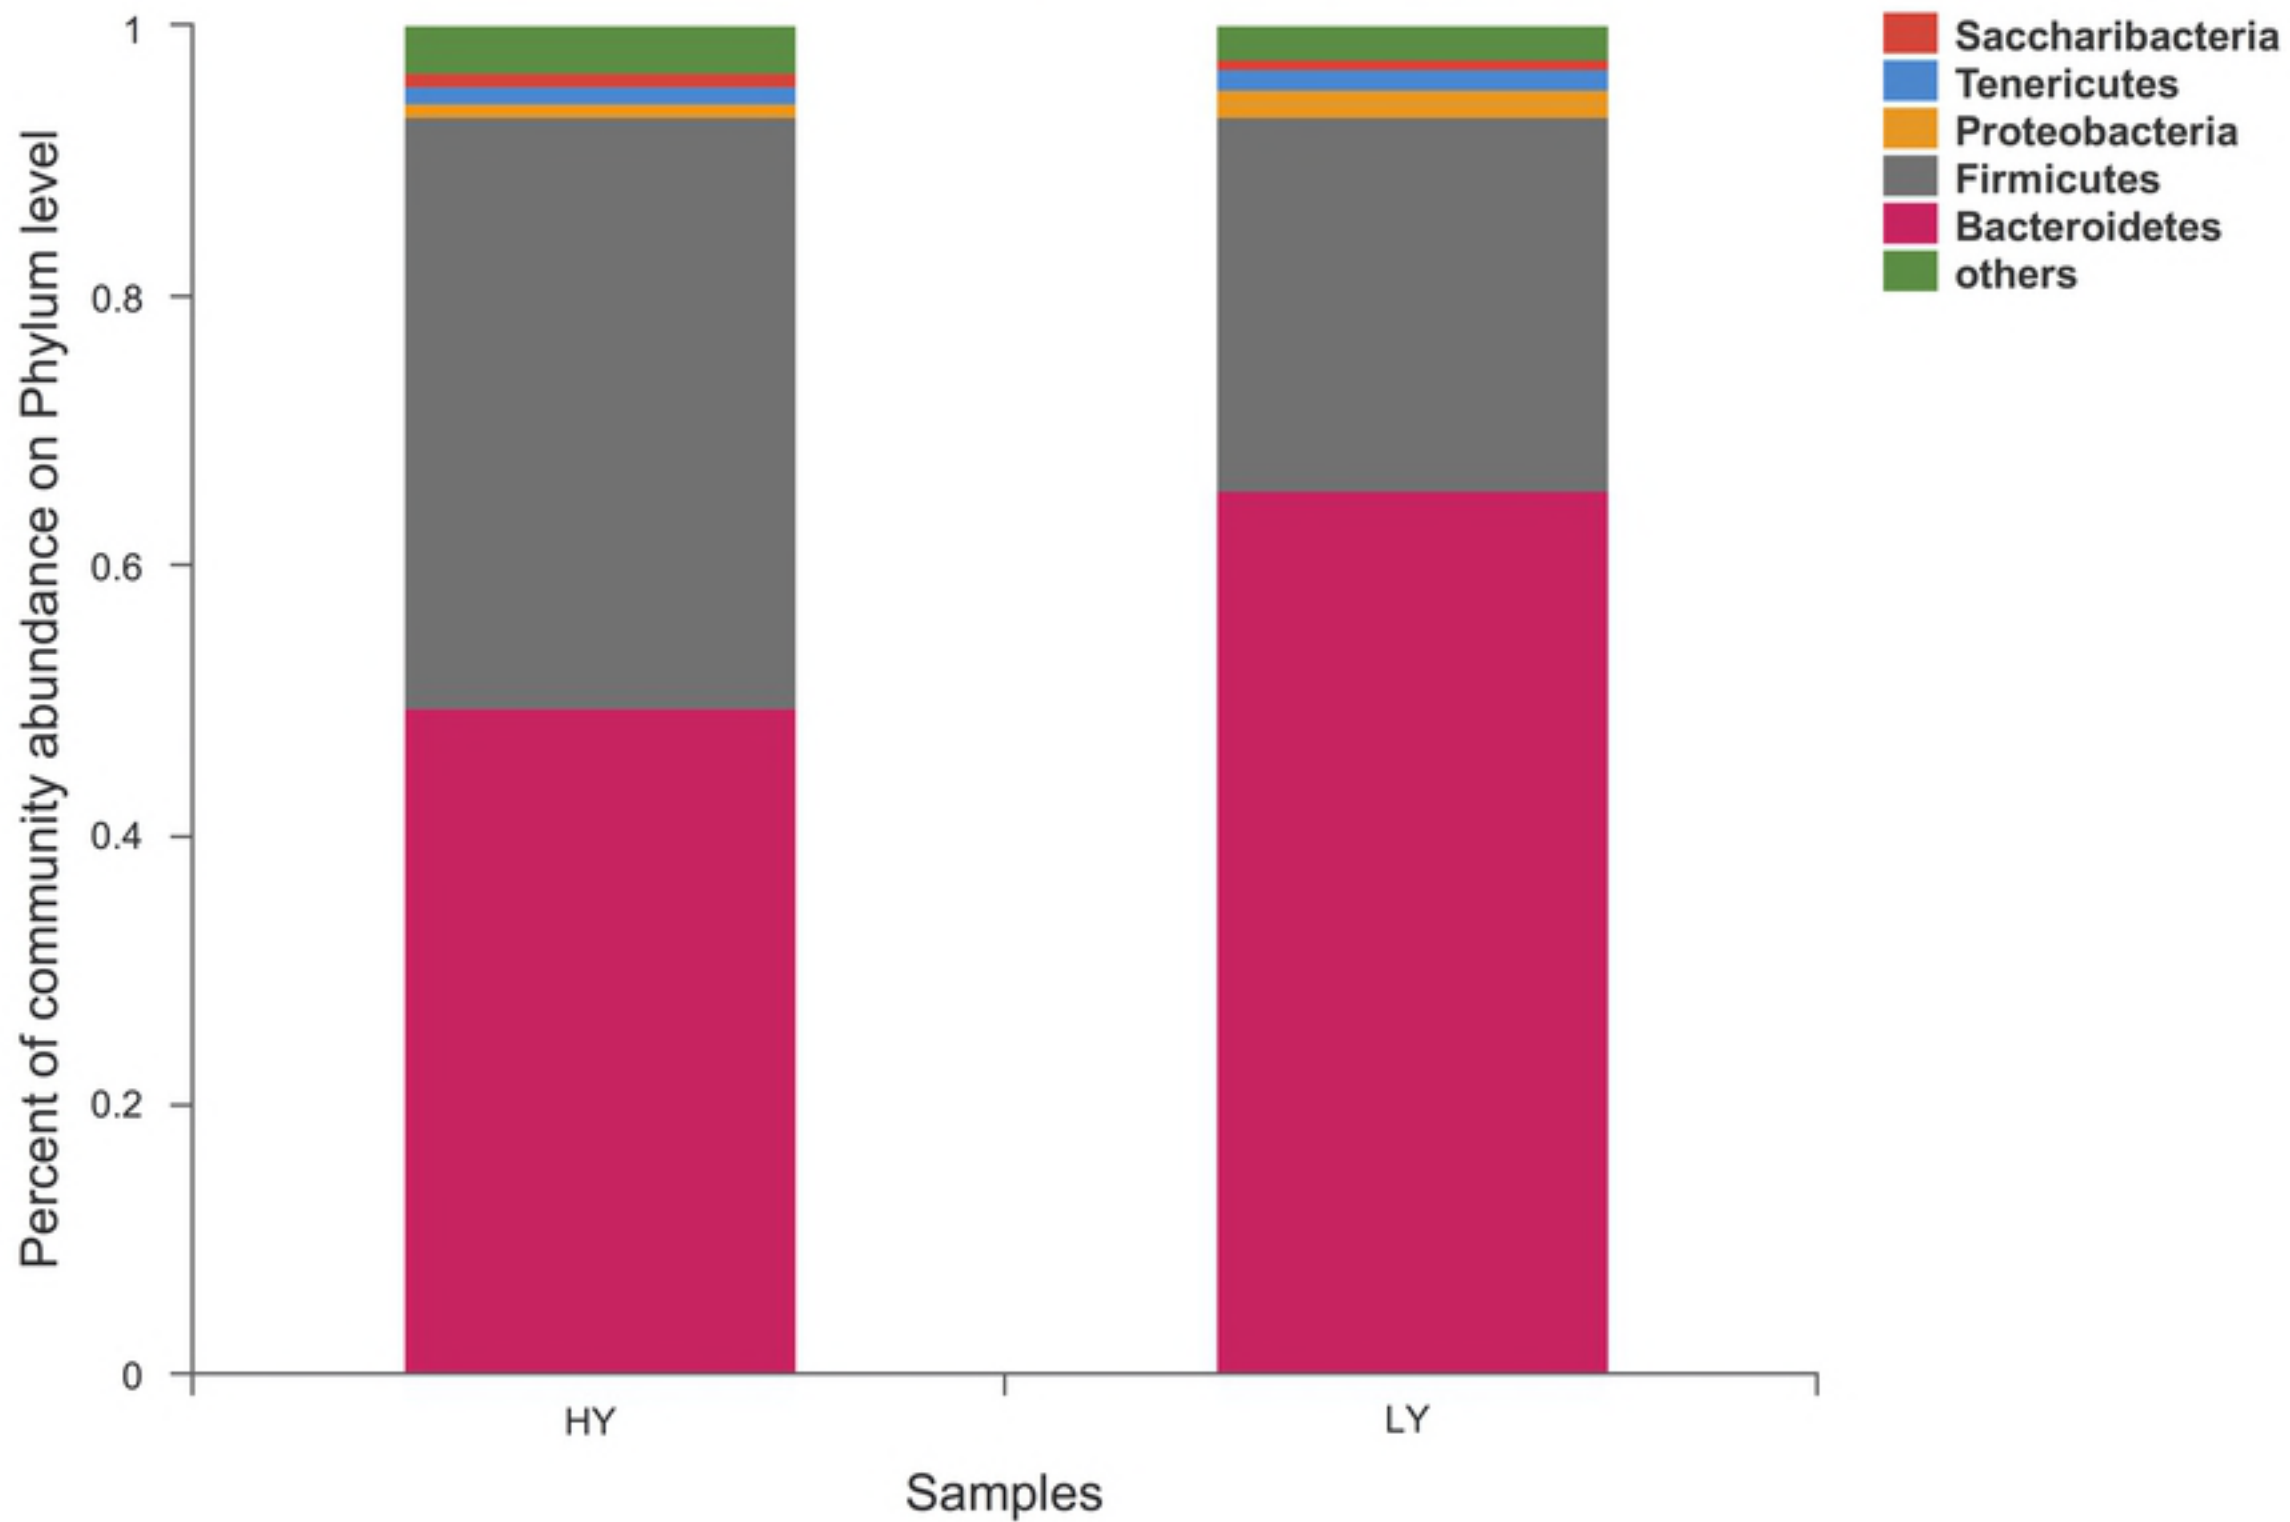

# Community barplot analysis

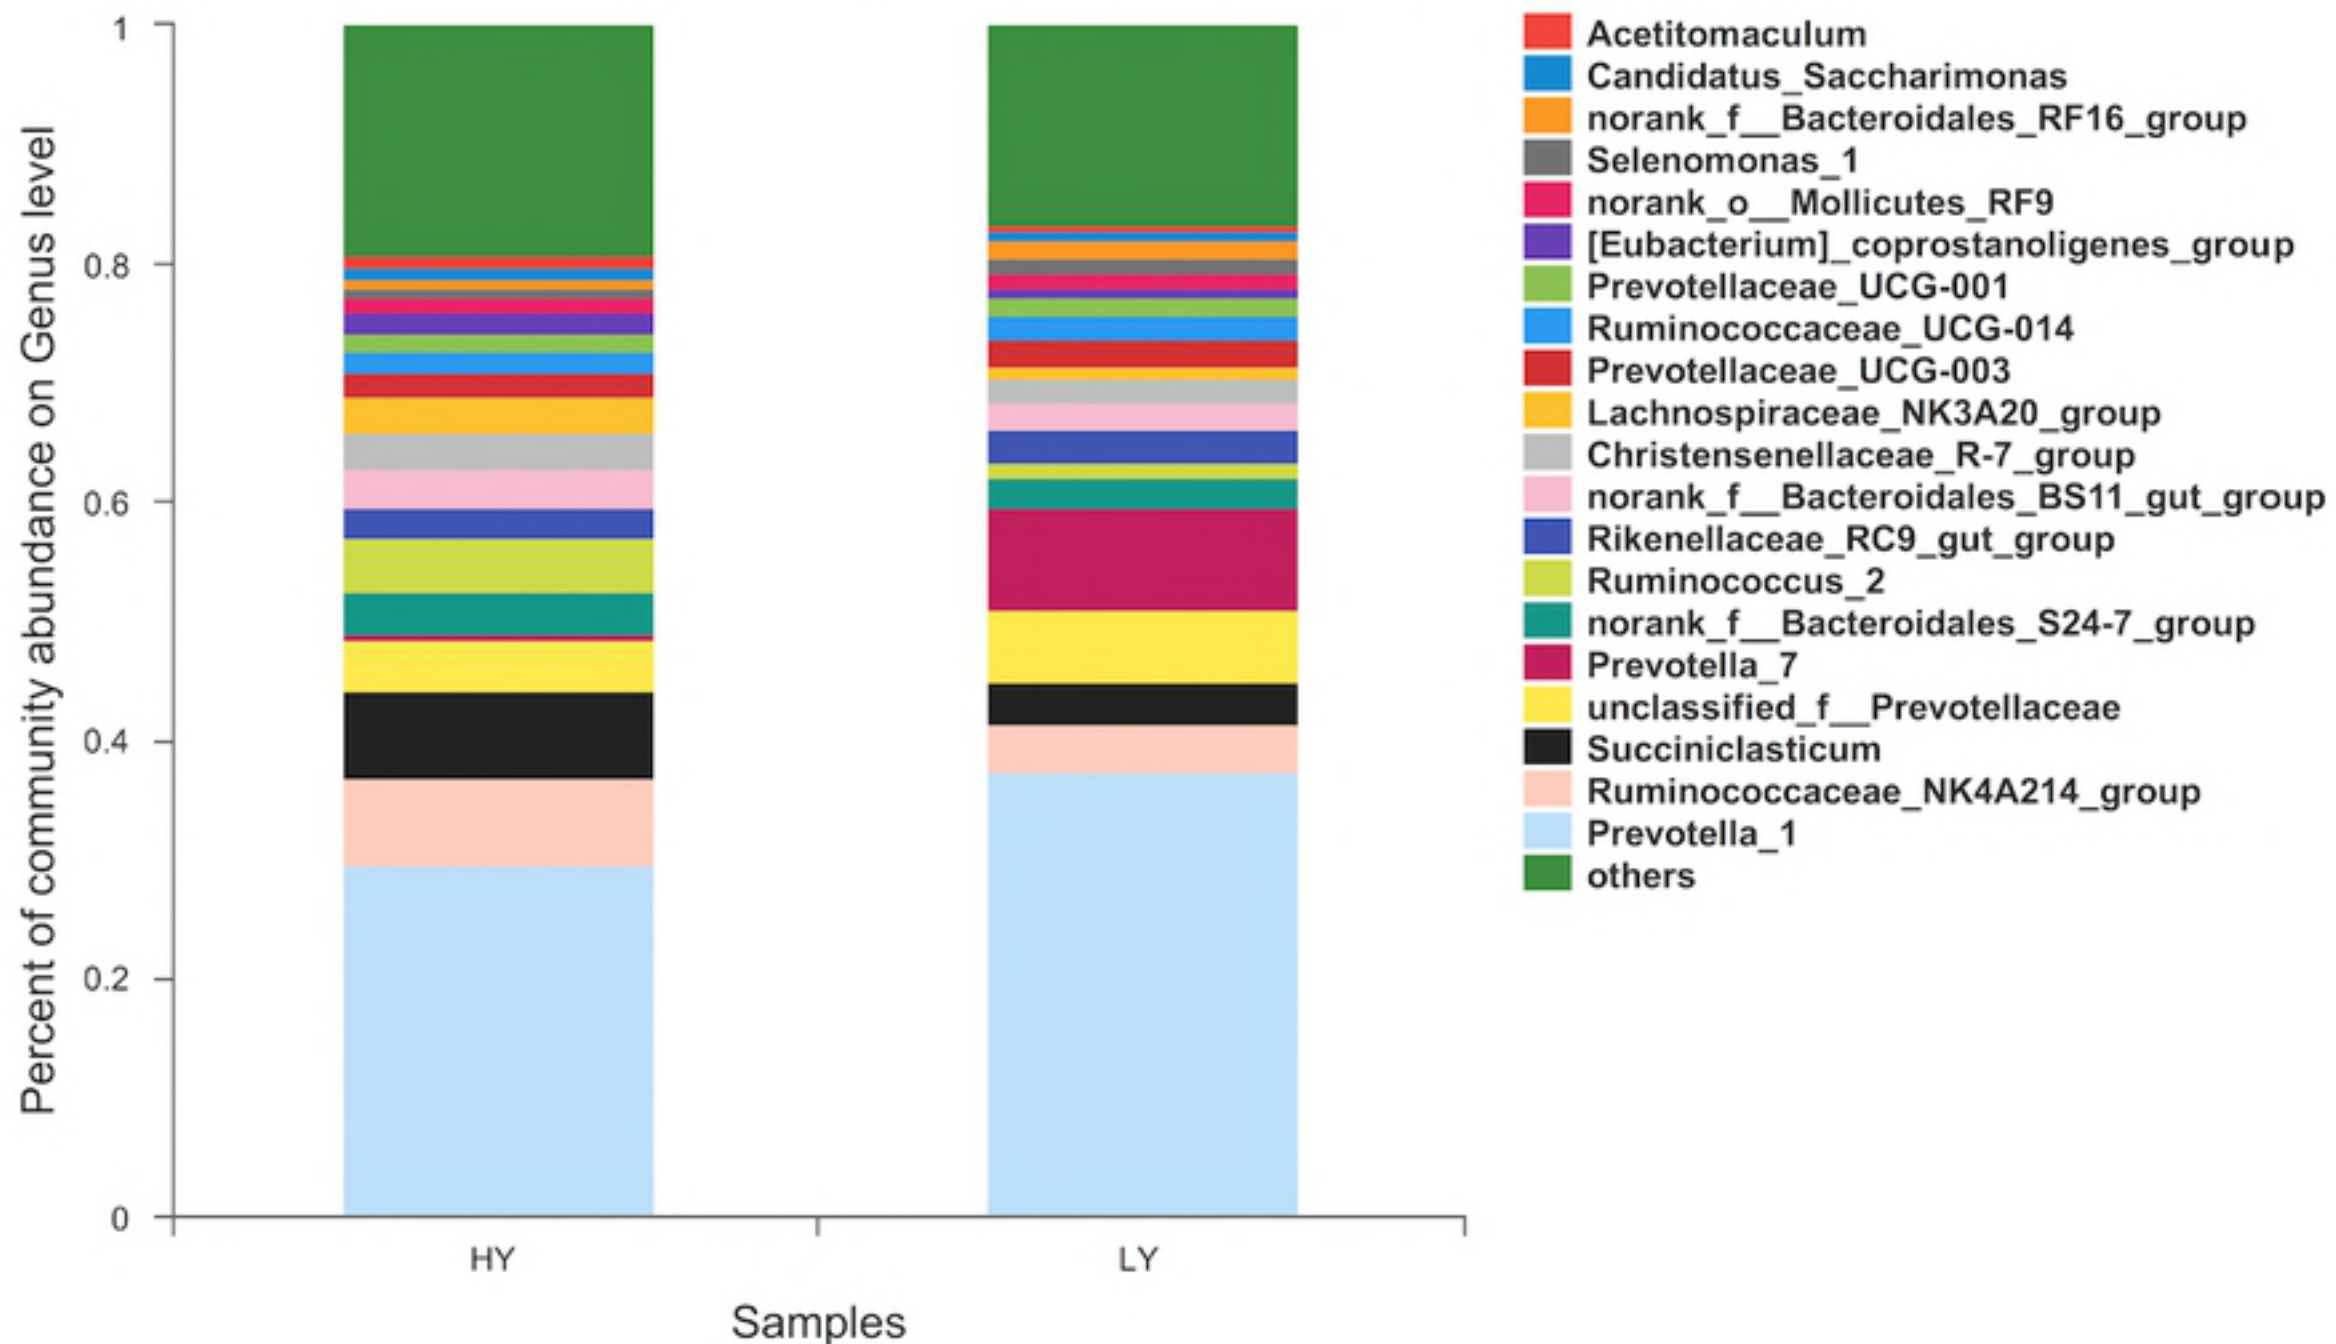

## Student's t-test bar plot on Genus level

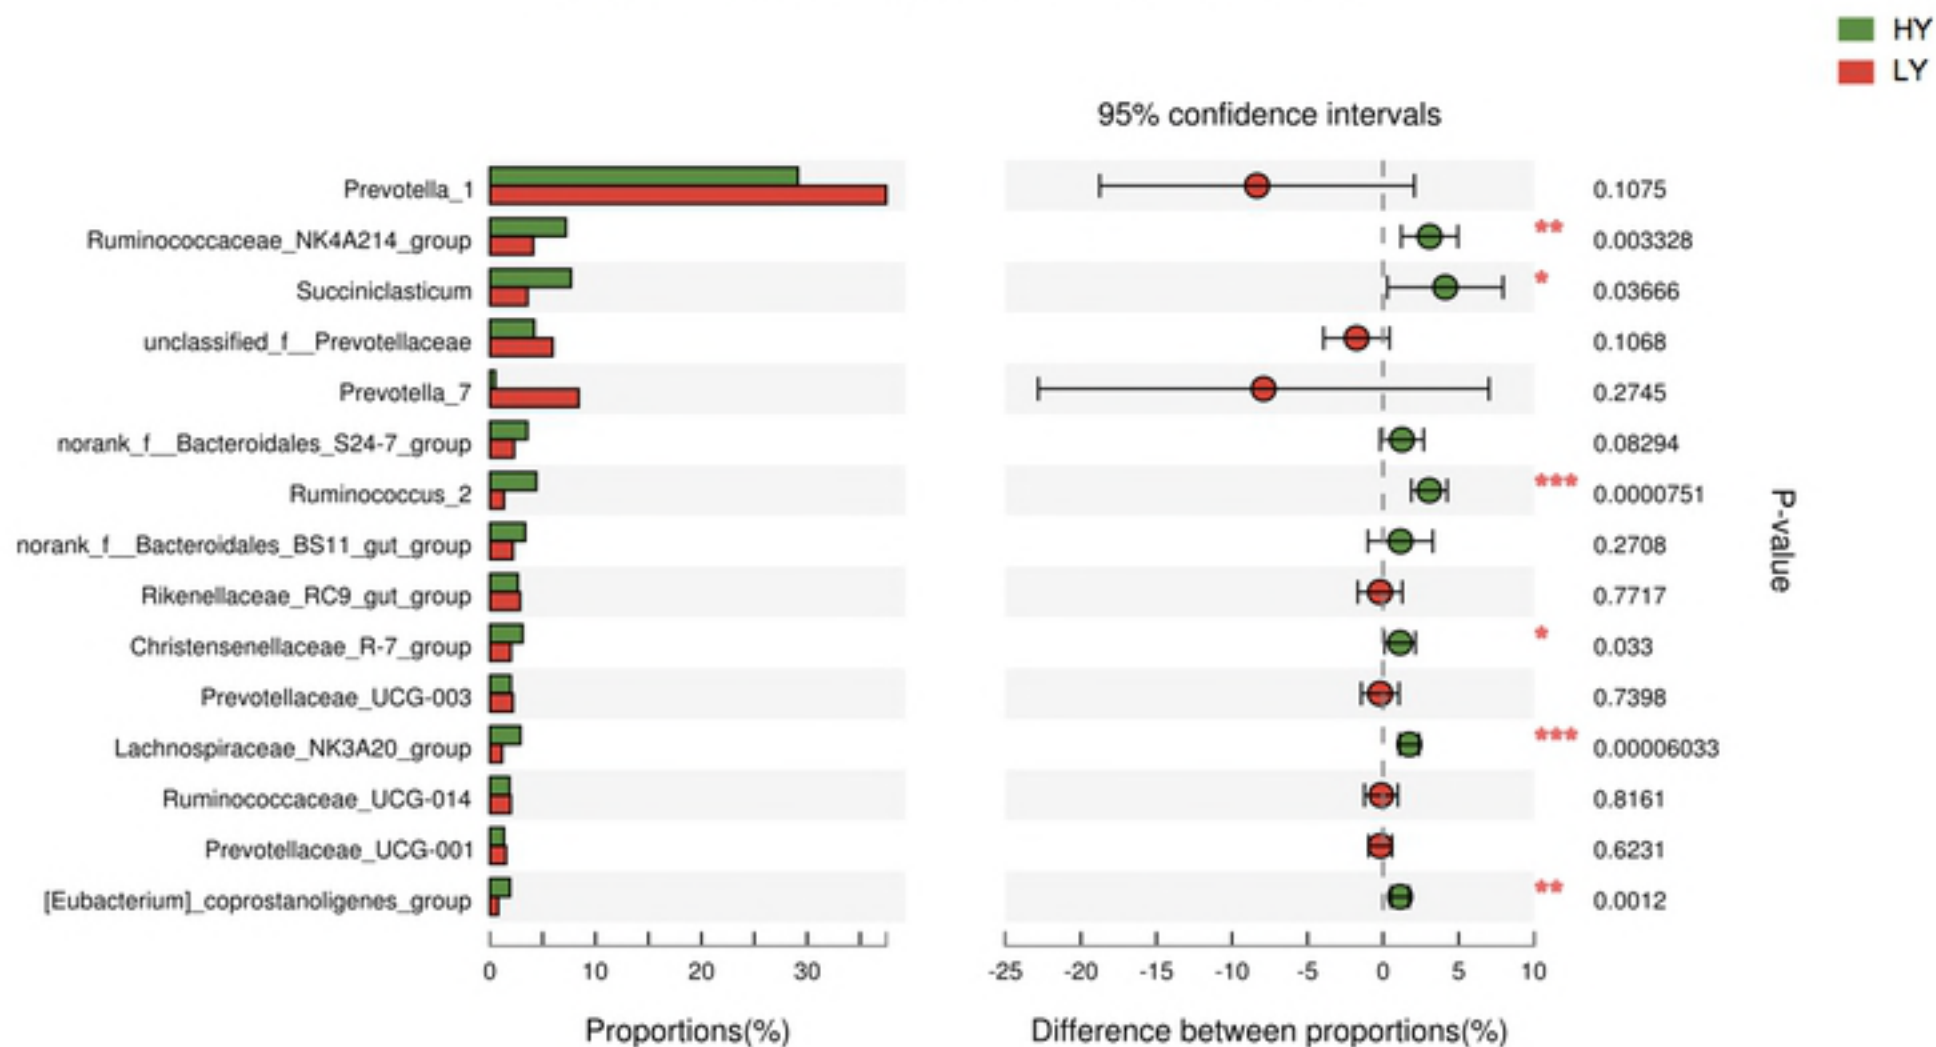

# Pearson Correlation Heatmap

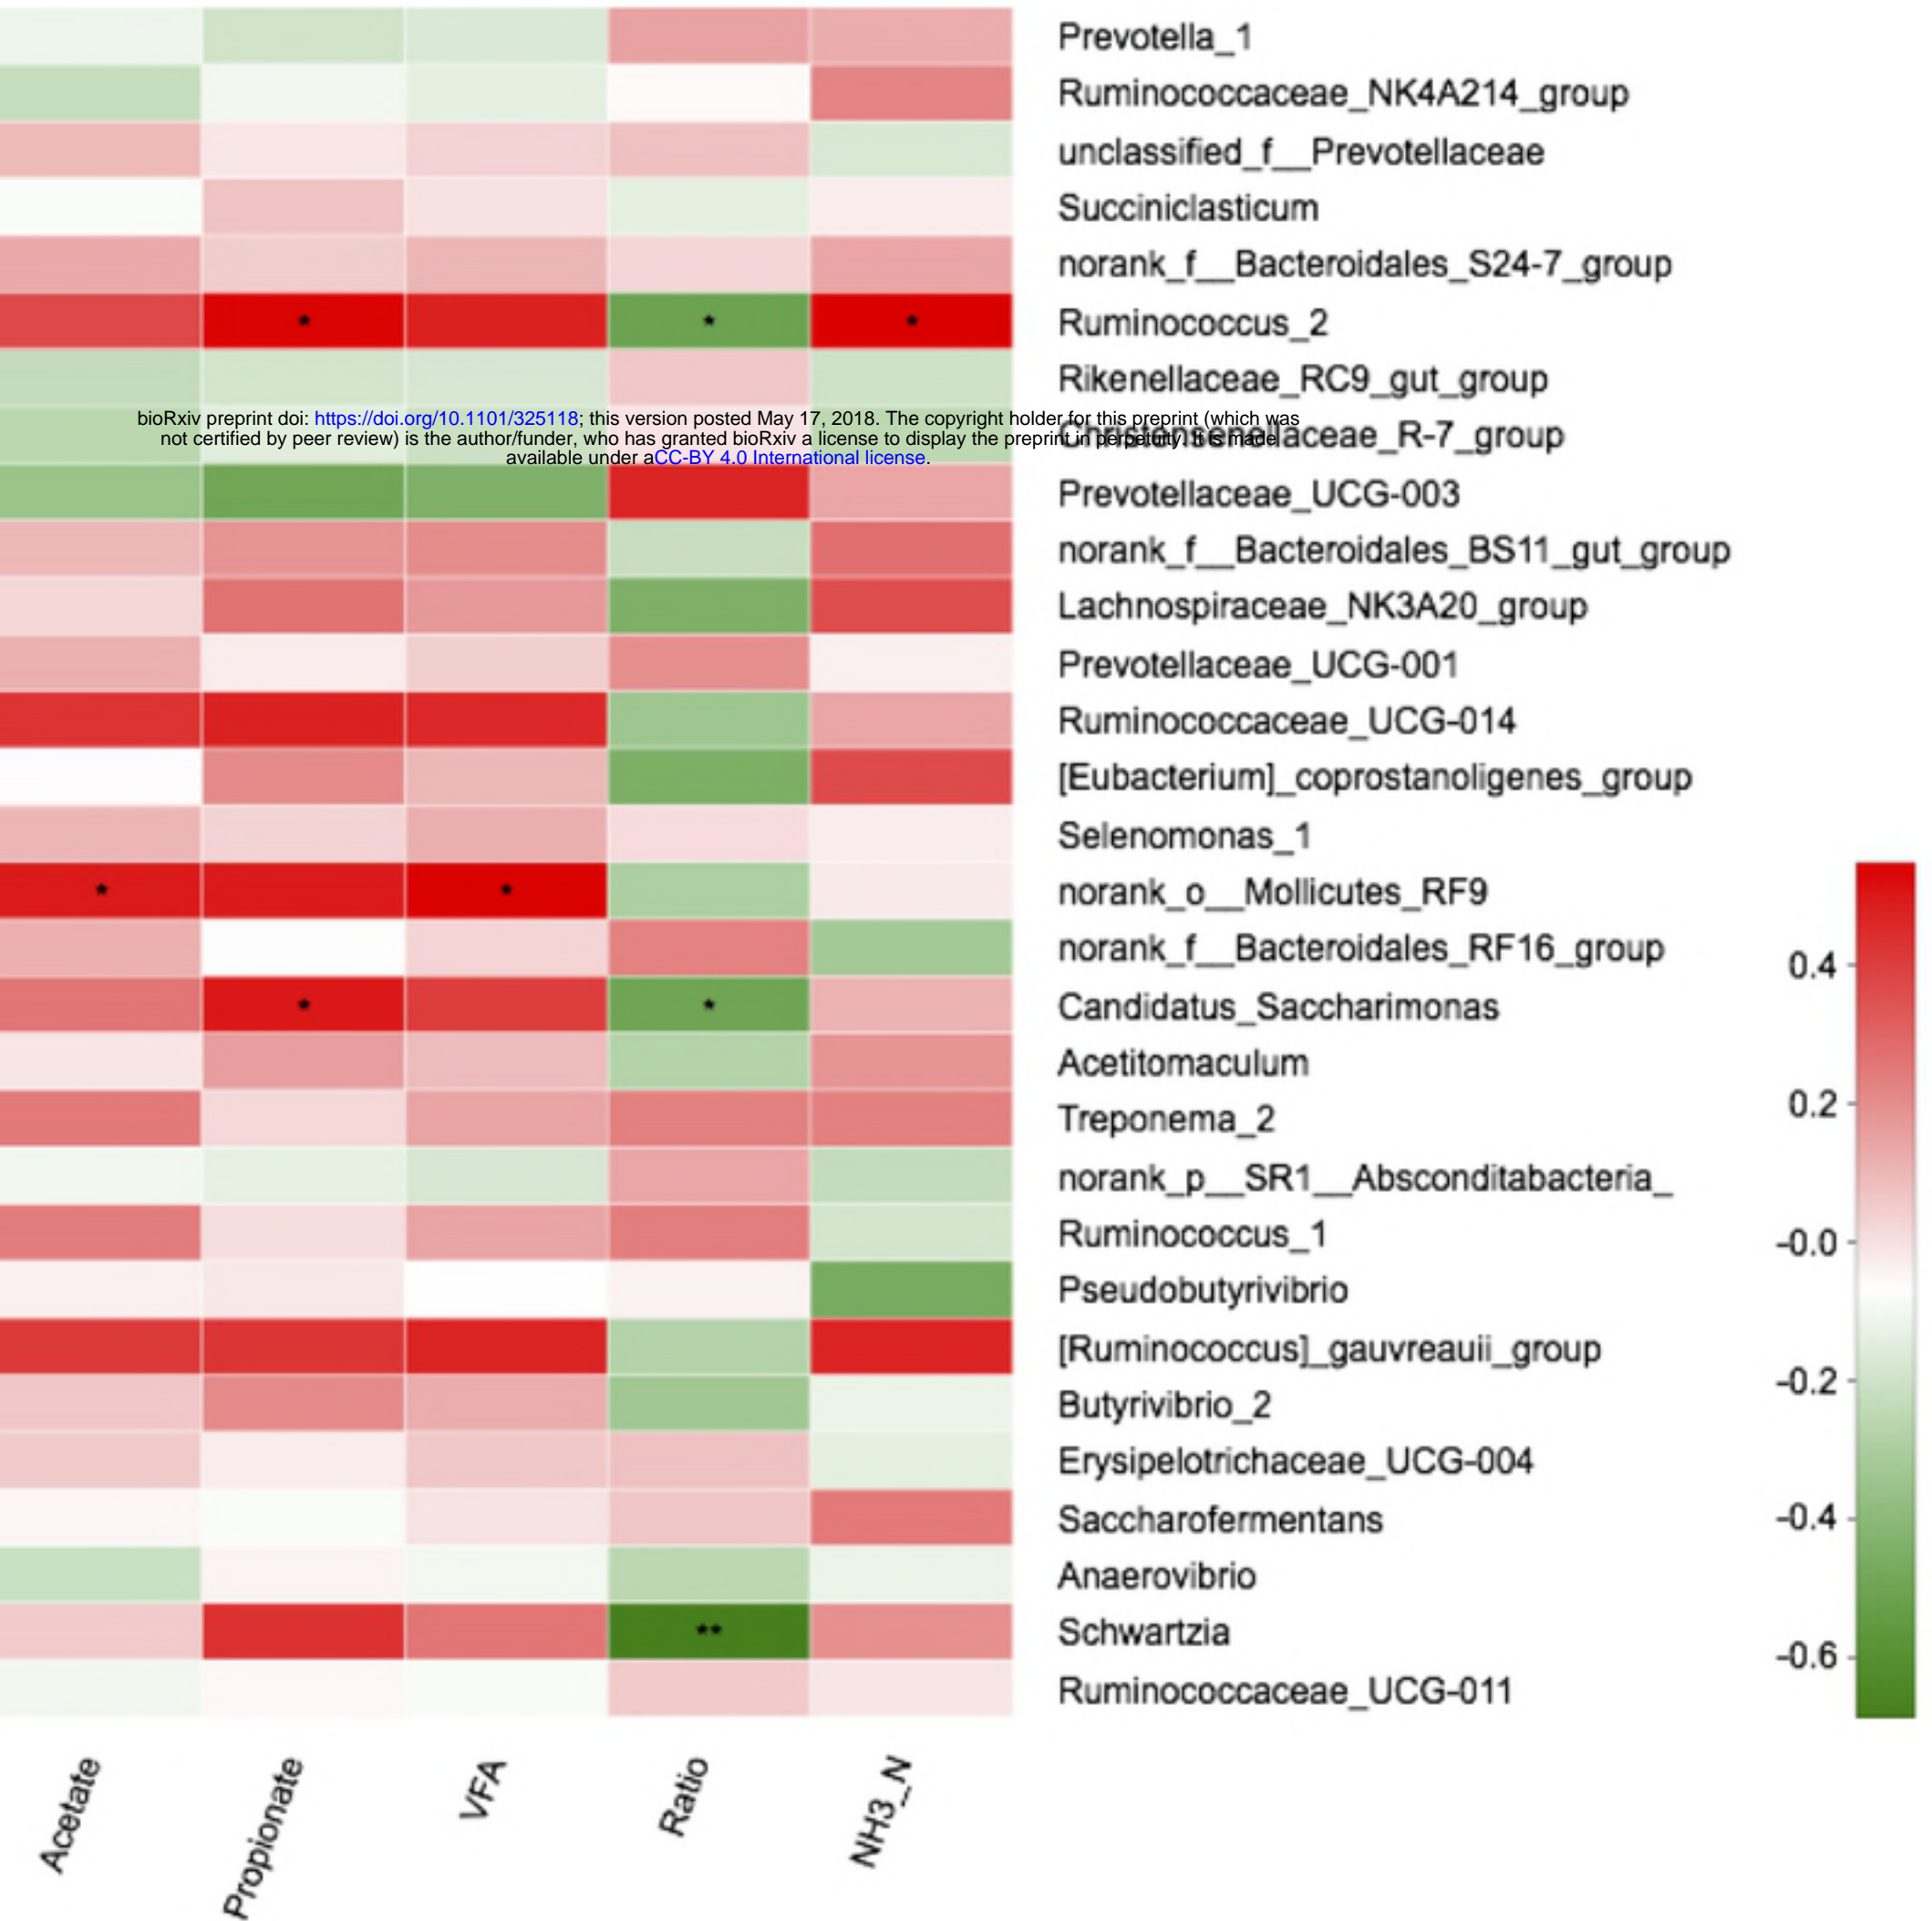

Source: https://www.biorxiv.org/content/10.1101/325118v1.full.pdf
